# Supplementary material for: A Lamin Family-Based Signature Predicts Prognosis and Immunotherapy Response in Hepatocellular Carcinoma
Source: Hindawi journal article supplement (doi:10.1155/2022/4983532), 2022-11-10
Supplement: f1 [file 4983532.f1.pdf]

### GO

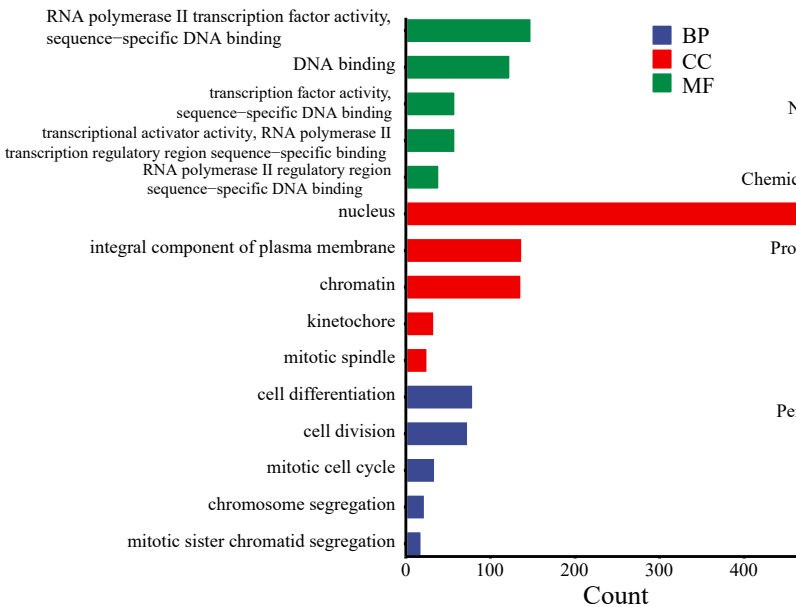

(a)

### KEGG

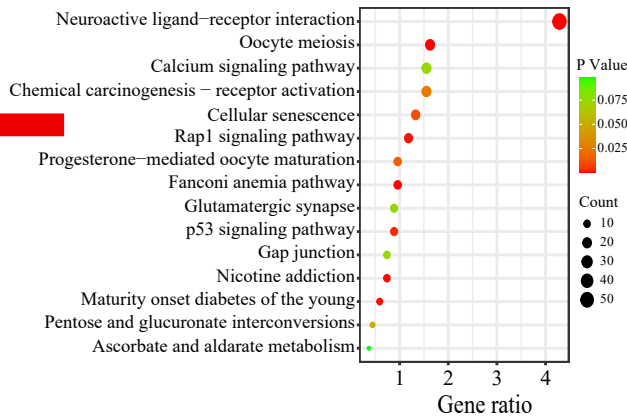

(b)

### GO

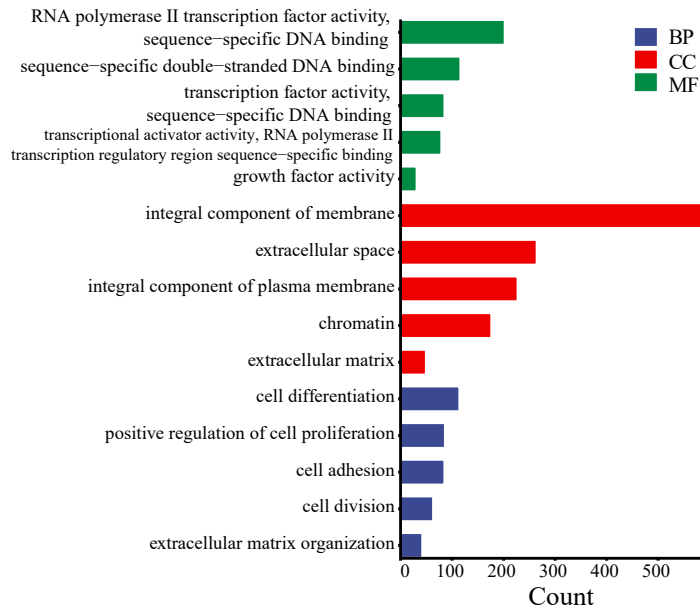

(c)

### KEGG

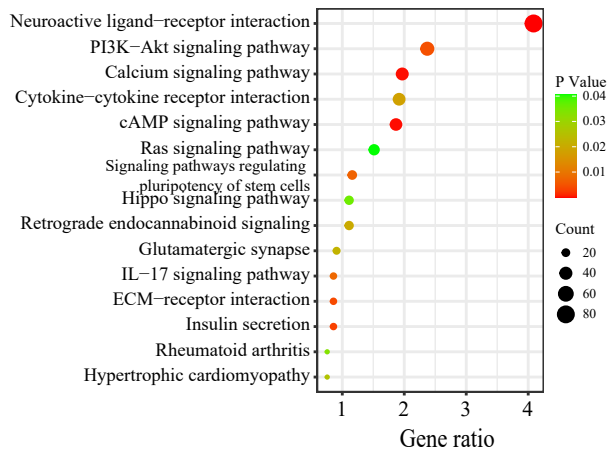

(d)
